# Supplementary material for: The simple neuroendocrine-immune regulatory network in oyster Crassostrea gigas mediates complex functions
Source: PubMed Central journal article supplement (PMC4872224; doi:10.1038/srep26396), 2016-05-19
Supplement: srep26396-s1.pdf [file srep26396-s1.pdf]

# **The simple neuroendocrine-immune regulatory network in oyster *Crassostrea gigas* mediates complex functions**

Zhaoqun Liu <sup>a,c,#</sup>, Lingling Wang <sup>a,b,#</sup>, Zhi Zhou <sup>a</sup>, Ying Sun <sup>a,c</sup>, Mengqiang Wang <sup>a</sup>, Hao Wang <sup>a</sup>, Zhanhui Hou <sup>a</sup>, Dahai Gao <sup>a</sup>, Qiang Gao <sup>a</sup>, Linsheng Song <sup>b,\*</sup>

<sup>a</sup>Key Laboratory of Experimental Marine Biology, Institute of Oceanology, Chinese Academy of Sciences, Qingdao 266071, China

<sup>b</sup>Key Laboratory of Mariculture & Stock Enhancement in North China's Sea, Ministry of Agriculture, Dalian Ocean University, Dalian 116023, China.

<sup>c</sup> University of Chinese Academy of Sciences, Beijing 100049, China

<sup>#</sup>These authors contributed equally to this study.

\*Correspondence to:

Dr. Linsheng Song

Dalian Ocean University, Dalian 116023, China.

Tel: + 86 411 84763173

Email address: lshsong@dlou.edu.cn

**Figure S1.** The full-length gels of the translocation of 2 oyster NF- $\kappa$ B molecules in haemocytes nuclei and cytoplasm. All the gels have been run under the same conditions, and the cropping lines are indicated with the red square frames.

PBS LPS+PBS LPS+ACh LPS+NE LPS+ENK LPS+NE+ENK LPS+ACh+ENK

PBS LPS+PBS LPS+ACh LPS+NE LPS+ENK LPS+NE+ENK LPS+ACh+ENK

Nucleus

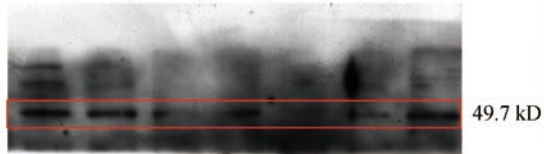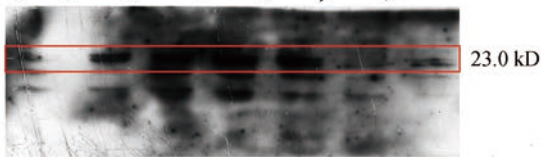

PBS LPS+PBS LPS+ACh LPS+NE Marker LPS+ENK LPS+NE+ENK LPS+ACh+ENK

PBS LPS+PBS LPS+ACh LPS+NE LPS+ENK LPS+NE+ENK LPS+ACh+ENK

Plasma

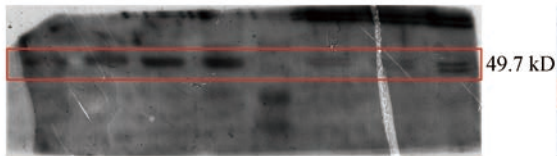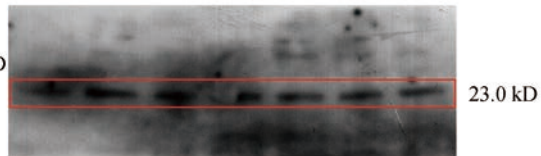

Cgp65

CgRel
